# Supplementary material for: Depth is Relative: The Importance of Depth on TEP in the NearSurface Environment
Source: Copernicus journal article supplement (doi:10.5194/os-2019-79), 2019-07-12
Supplement: Supplementary file 1 [file os-2019-79-supplement.pdf]

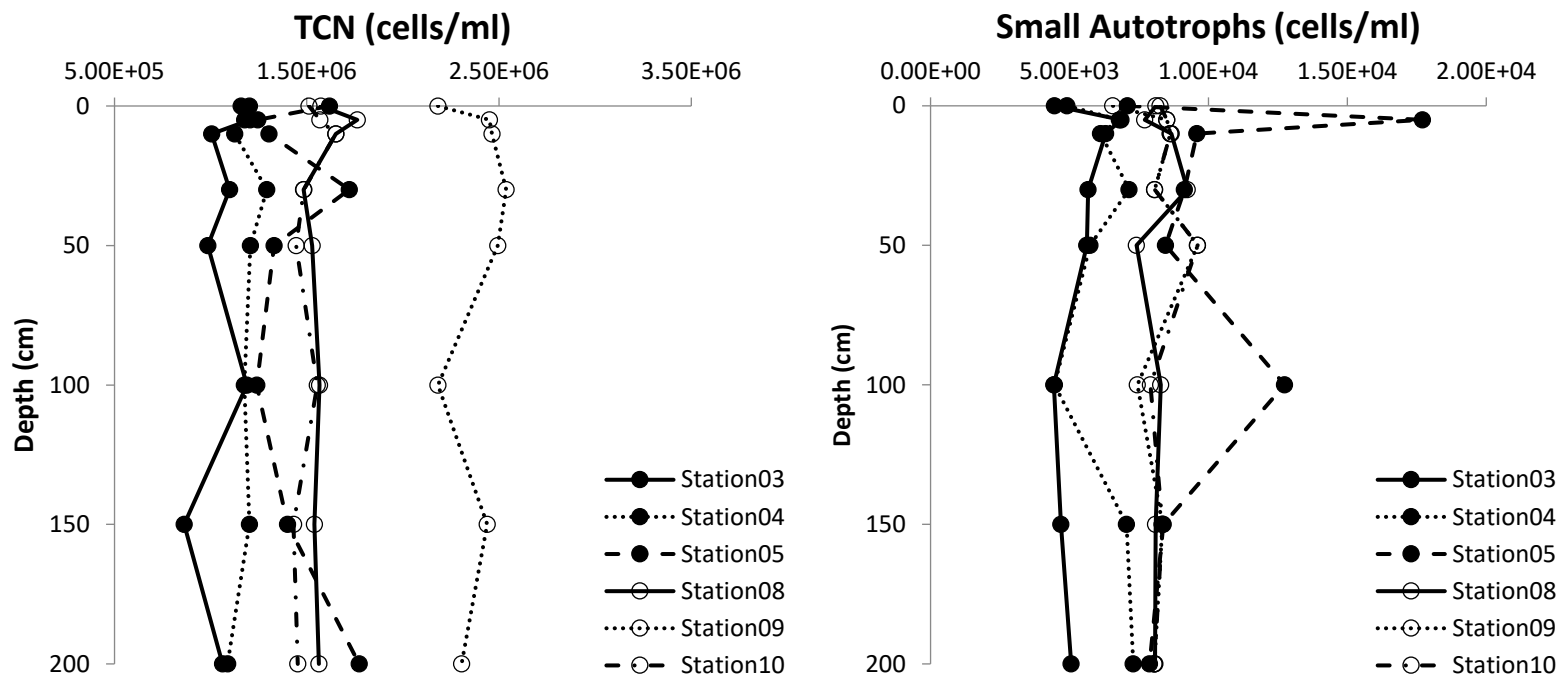

**Supplementary Figure S1:** Vertical profiles for (a) total cell number (TCN) and (b) small autotrophs from the Baltic cruise.

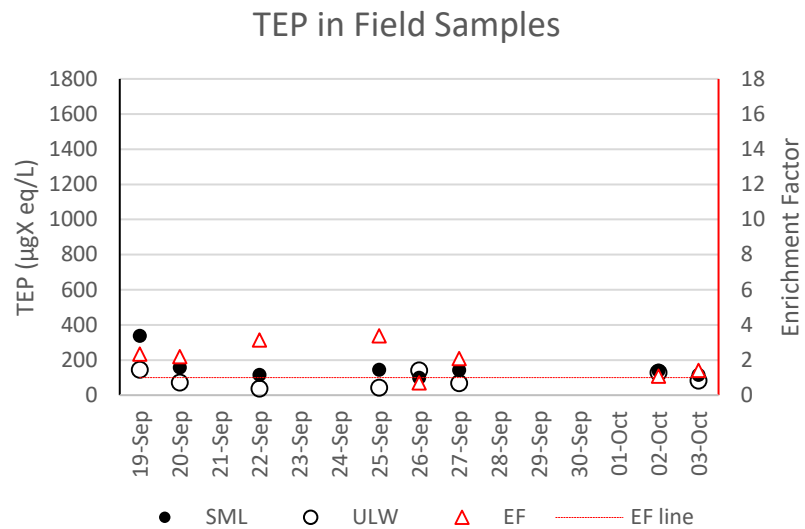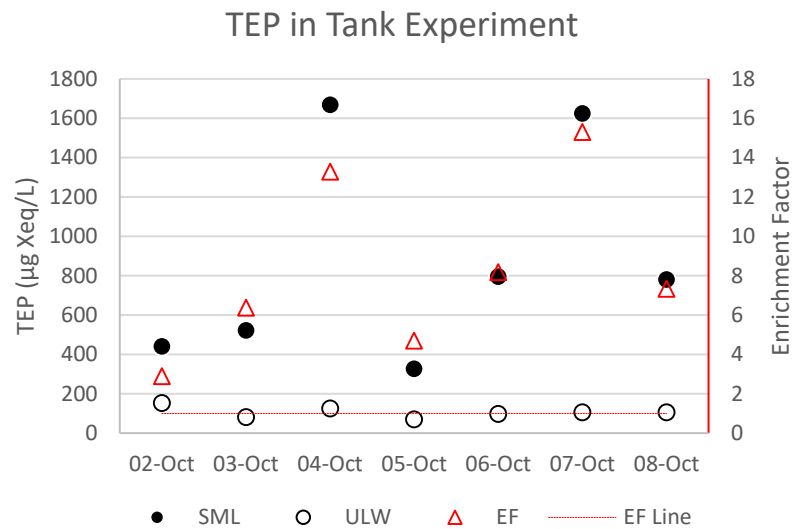

**Supplementary Figure S2:** TEP abundance and enrichment in field samples (a) and the tank experiment (b) during the Cape Verde campaign.
